# Supplementary material for: Synthesis of amphipathic superparamagnetic Fe3O4 Janus nanoparticles via a moderate strategy and their controllable self-assembly
Source: Royal Society of Chemistry journal article supplement (doi:10.1039/c6ra04648g), 2016-01-01
Supplement: c6ra04648g1.pdf [file c6ra04648g1.pdf]

## Supporting Information

# Synthesis of Amphipathic Superparamagnetic Fe<sub>3</sub>O<sub>4</sub> Janus Nanoparticles via a Moderate Strategy and Their Controllable Self-assembly

*Wenliao Li, Xiaojun Cai, Shaohua Ma, Xiaohui Zhan, Fang Lan, Yao Wu\*, Zhongwei Gu*

National Engineering Research Center for Biomaterials, Sichuan University, Chengdu,  
610064, China

**Corresponding Author**

**\*E-mail:** wuyao@scu.edu.cn.

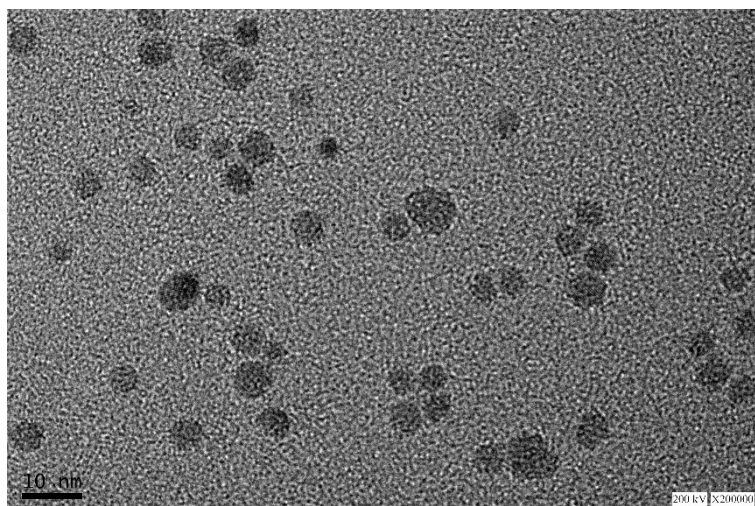

**Figure S1.** TEM image of hydrophilic Fe<sub>3</sub>O<sub>4</sub> nanoparticles.

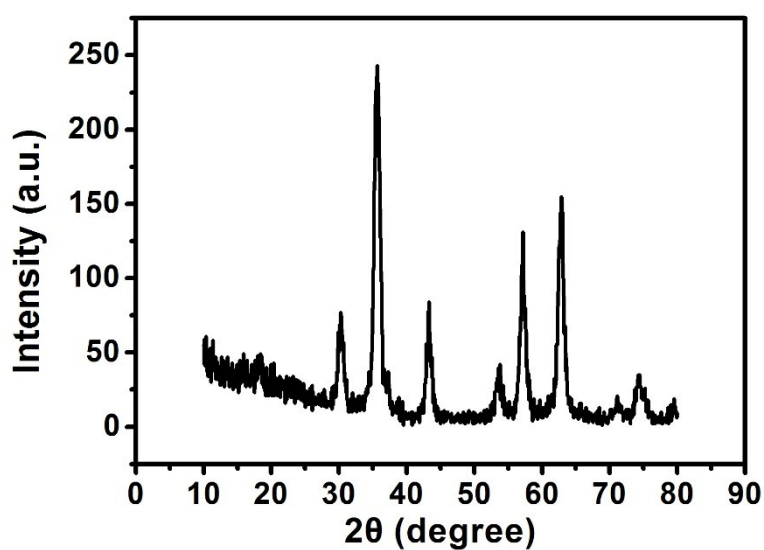

**Figure S2.** XRD pattern of hydrophilic Fe<sub>3</sub>O<sub>4</sub> nanoparticles.

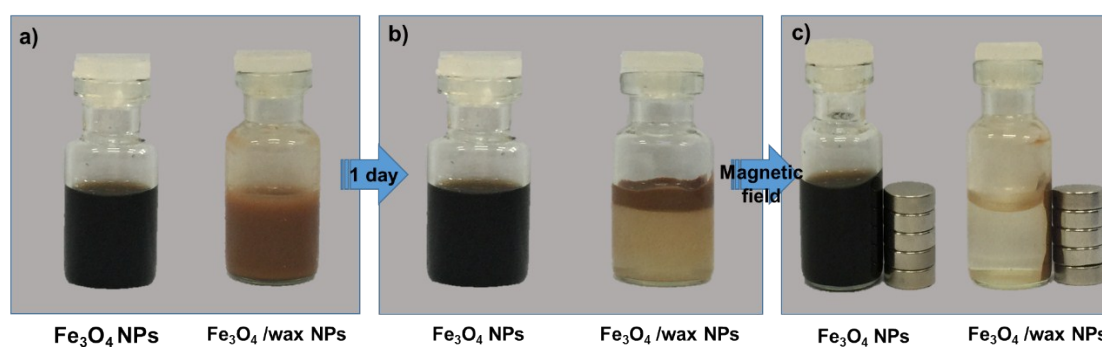

**Figure S3.** Visual evaluation of the stabilities (a, b) and magnetic responsiveness (c) of the Fe<sub>3</sub>O<sub>4</sub> NPs solution, Fe<sub>3</sub>O<sub>4</sub>/wax composite microsphere solution.

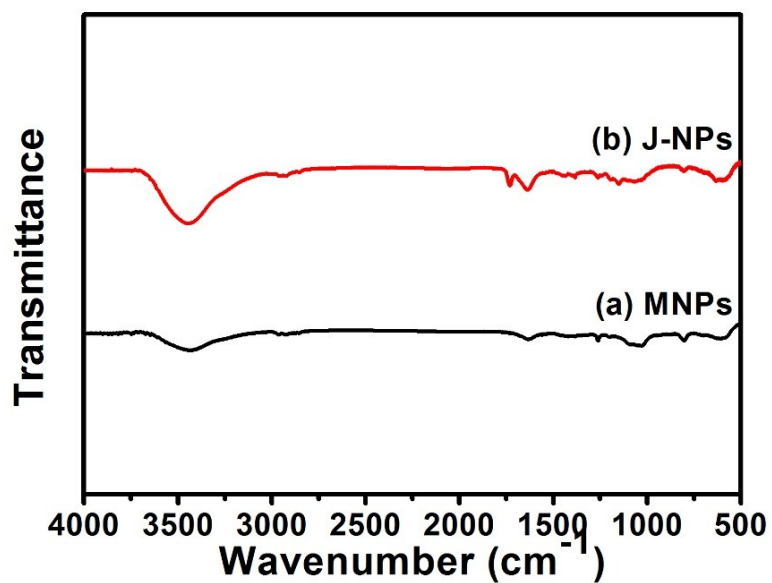

**Figure S4.** FTIR spectra of Fe<sub>3</sub>O<sub>4</sub> nanoparticles (MNPs) (a) and Janus Fe<sub>3</sub>O<sub>4</sub> nanoparticles (J-NPs) (b).

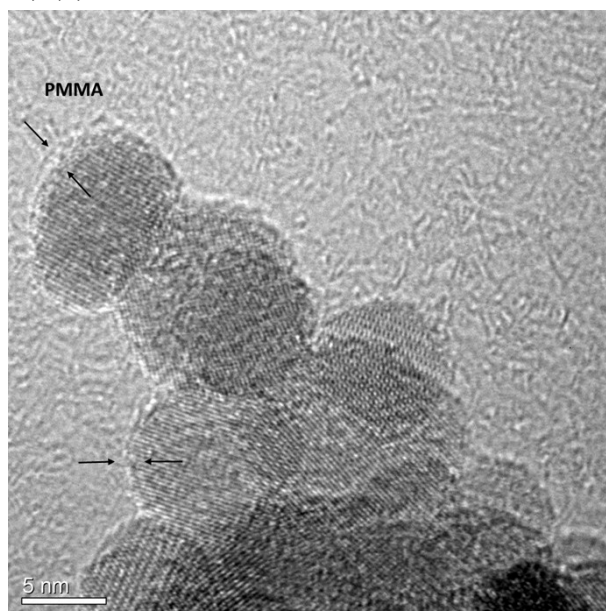

**Figure S5.** High-resolution TEM image of Janus Fe<sub>3</sub>O<sub>4</sub> nanoparticles in THF.

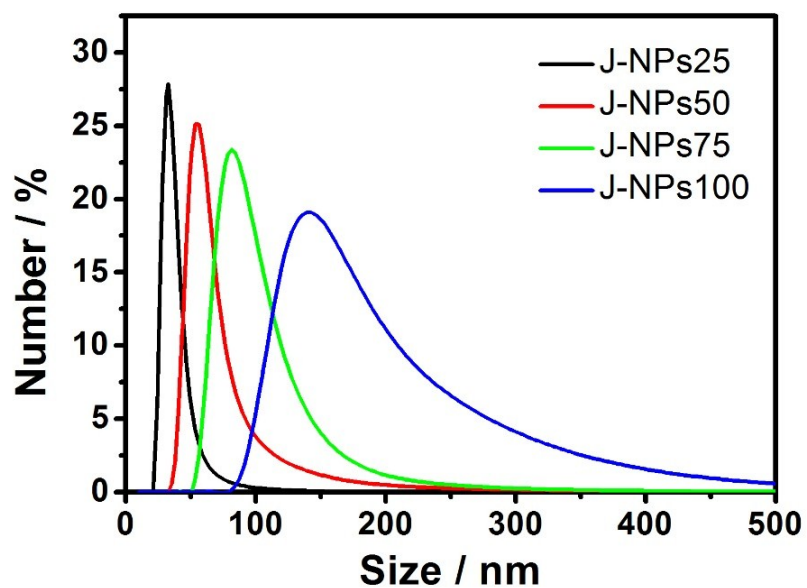

**Figure S6.** DLS of J-NPs25, J-NPs50, J-NPs75, and J-NPs100 self-assembly in water.

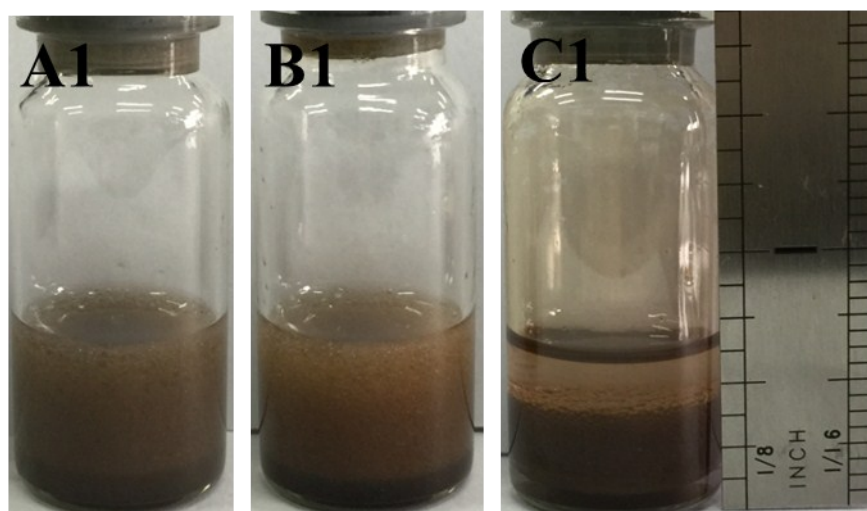

**Figure S7.** Influence of Janus  $\text{Fe}_3\text{O}_4$  nanoparticles with different polymerization degree of PMMA on 1:1 toluene-water emulsion containing 3.75 mg/mL: (A1) J-NPs25; (B1) J-NPs50; (C1): J-NPs75; 50 min of shaking at 800 rpm; 2 days standing time.
